# Supplementary material
Source: publisher figshare collection journal article supplement (https://tandf.figshare.com/ndownloader/files/12233519)
Supplement: Supplementary file 1 [file 12233519]

**Supplemental Material**

| **CINAHL Search Strategy** |
| --- |
| 1. Child* 2. Youth 3. 1 or 2 4. Photovoice 5. Photo elicitation 6. Autophotograph* 7. Visual ethnograph* 8. Participatory photograph* 9. Photo* and method and (qualitative or phenomenolog*) 10. 4 or 5 or 6 or 7 or 8 11. Disabil* 12. Cerebral Palsy or CP 13. Muscular dystrophy 14. (Learning disabil* or learning disorders or intellectual disability) 15. Amputee or amputation 16. Hearing impairment 17. Visual impairment 18. Autism or ASD 19. (Attention deficit hyperactivity disorder or attention deficit disorder with hyperactivity) or ADHD 20. Cystic fibrosis or CF 21. (Deaf or deaf-blind) 22. Blind 23. Fluency disorder 24. Stuttering 25. Specific language impairment or SLI 26. Spina bifida 27. Traumatic brain injury 28. Acquired brain injury 29. Brain injury 30. Developmental coordination disorder or  DCD 31. Down syndrome 32. 11 or 12 or 13 or 14 or 15 or 16 or 17 or 18 or 19 or 20 or 21 or 22 or 23 or 24 or 25 or 26 or 27 or 28 or 29 or 30 or 31 33. 3 and 10 and 32 |
| Note that the asterisks at the end of a word indicates that all words beginning with those letters will be included into the search. For example, disabil* will search disability and disabilities. |

| **ERIC Search Strategy** |
| --- |
| 1. Child* 2. Youth 3. 1 or 2 4. Photovoice 5. Photo elicitation 6. Autophotograph* 7. Visual ethnograph* 8. Participatory photograph* 9. Photo* and method and (qualitative or phenomenolog*) 10. 4 or 5 or 6 or 7 or 8 11. Disabil* 12. Cerebral Palsy or CP 13. Muscular dystrophy 14. Learning Disabil* 15. Amputee or amputation 16. Hearing impairment 17. Visual impairment 18. Autism or ASD 19. Attention deficit hyperactivity disorder or ADHD 20. Cystic fibrosis or CF 21. Deaf 22. Blind 23. Fluency disorder 24. Stuttering 25. Specific language impairment or SLI 26. Spina bifida 27. Traumatic brain injury 28. Acquired brain injury 29. Brain injury 30. Developmental coordination disorder or DCD 31. Down syndrome 32. 11 or 12 or 13 or 14 or 15 or 16 or 17 or 18 or 19 or 20 or 21 or 22 or 23 or 24 or 25 or 26 or 27 or 28 or 29 or 30 or 31 33. 3 and 10 and 32 |
| Note that the asterisks at the end of a word indicates that all words beginning with those letters will be included into the search. For example, disabil* will search disability and disabilities. |

| **PsychInfo Search Strategy (OVID)** |
| --- |
| 1. Child* 2. Youth 3. 1 or 2 4. Photovoice 5. Photo elicitation 6. Autophotograph* 7. Visual ethnograph* 8. Participatory photograph* 9. Photo* and method and (qualitative or phenomenolog*) 10. 4 or 5 or 6 or 7 or 8 11. (Disabil* or intellectual development disorder or developmental disabilities) 12. Cerebral Palsy or CP 13. Muscular dystrophy 14. (Learning disabil* or learning disabilities) 15. Amputee or amputation 16. (Hearing impairment or hearing aids or hearing disorders or partially hearing impaired) 17. (Visual impairment or vision disorders) 18. (Autism or autism spectrum disorders) or ASD 19. (Attention deficit hyperactivity disorder or attention deficit disorder with hyperactivity) or ADHD 20. Cystic fibrosis or CF 21. (Deaf or deaf blind) 22. Blind 23. (Fluency disorder or language disorders or stuttering or communication disorders or speech disorders) 24. Stuttering 25. (Specific language impairment or language disorders or developmental disabilities) or SLI 26. Spina bifida 27. Traumatic brain injury 28. Acquired brain injury 29. Brain injury 30. (Developmental coordination disorder or dyspraxia) or DCD 31. (Down syndrome or down’s syndrome) 32. 11 or 12 or 13 or 14 or 15 or 16 or 17 or 18 or 19 or 20 or 21 or 22 or 23 or 24 or 25 or 26 or 27 or 28 or 29 or 30 or 31 33. 3 and 10 and 32 |
| Note that the asterisks at the end of a word indicates that all words beginning with those letters will be included into the search. For example, disabil* will search disability and disabilities. |

| **Web of Science Search Strategy** |
| --- |
| 1. Child* 2. Youth 3. 1 or 2 4. Photovoice 5. Photo elicitation 6. Autophotograph* 7. Visual ethnograph* 8. Participatory photograph* 9. Photo* and method and (qualitative or phenomenolog*) 10. 4 or 5 or 6 or 7 or 8 11. Disabil* 12. Cerebral Palsy or CP 13. Muscular dystrophy 14. Learning Disabil* 15. Amputee or amputation 16. Hearing impairment 17. Visual impairment 18. Autism or ASD 19. Attention deficit hyperactivity disorder or ADHD 20. Cystic fibrosis or CF 21. Deaf 22. Blind 23. Fluency disorder 24. Stuttering 25. Specific language impairment or SLI 26. Spina bifida 27. Traumatic brain injury 28. Acquired brain injury 29. Brain injury 30. Developmental coordination disorder or DCD 31. Down syndrome 32. 11 or 12 or 13 or 14 or 15 or 16 or 17 or 18 or 19 or 20 or 21 or 22 or 23 or 24 or 25 or 26 or 27 or 28 or 29 or 30 or 31 33. 3 and 10 and 32 |
| Note that the asterisks at the end of a word indicates that all words beginning with those letters will be included into the search. For example, disabil* will search disability and disabilities. |

Citations

1. Bruce BS, Ungar M, Waschbusch DA. Perceptions of risk among children with and without attention deficit/hyperactivity disorder. Int J Inj Contr Saf Promot. 2009 Dec;16(4):189-196.
2. Capewell C. Glue ear–a common but complicated childhood condition. JORSEN. 2016 Apr;16(2):122-131.
3. Carnahan CR. Photovoice: Engaging children with autism and their teachers. Teach Escept Child. 2006 Nov;39(2):44-50.
4. Cheak-Zamora NC, Teti M, Maurer-Batjer A, Halloran D. Snapshots of growing up: Youth with autism explore adulthood through photovoice. J Dev Behav Pediatr. 2016 Jul;37(6):433-441.
5. Cussen A, Howie L, Imms C. Looking to the future: adolescents with cerebral palsy talk about their aspirations–a narrative study. Disabil Rehabil. 2012 Dec;34(24):2103-2110.
6. Danker J, Strnadová I, Cumming TM. Engaging Students With Autism Spectrum Disorder in Research Through Participant-Driven Photo-Elicitation Research Technique.AASE. 2017 Jul;41(1):35-50.
7. Faircloth SC, Hynds A, Jacob H, Green C, Thompson P. Ko wai Au? Who am I? Examining the multiple identities of Māori youth. Int J Qual Stud Educ. 2016 Mar;29(3):359-380.
8. Fereday J, MacDougall C, Spizzo M, Darbyshire P, Schiller W. "There's nothing I can't do–I just put my mind to anything and I can do it": a qualitative analysis of how children with chronic disease and their parents account for and manage physical activity. BMC Pediatr. 2009 Jan;9(1):1-16.
9. Gibson BE, King G, Teachman G, Mistry B, Hamdani Y. Assembling activity/setting participation with disabled young people. Sociol Health Illn. 2017 May;39(4):497-512.
10. Gibson BE, Mistry B, Smith B, Yoshida KK, Abbott D, Lindsay S, Hamdani Y. The integrated use of audio diaries, photography, and interviews in research with disabled young men. Int J Qual Methods. 2013 Feb;12(1):382-402.
11. Goodwin DL. The meaning of help in PE: Perceptions of students with physical disabilities. Adapt Phys Activ Q. 2001 Jul;18(3):289-303.
12. Ha VS, Whittaker A. ‘Closer to my world’: Children with autism spectrum disorder tell their stories through photovoice. Glob Public Health. 2016 Jul;11(5-6):546-563.
13. King G, Gibson BE, Mistry B, Pinto M, Goh F, Teachman G, Thompson L. An integrated methods study of the experiences of youth with severe disabilities in leisure activity settings: the importance of belonging, fun, and control and choice. Disabil Rehabi. 2014 Sept;36(19):1626-1635.
14. Lamb P, Firbank D, Aldous D. Capturing the world of physical education through the eyes of children with autism spectrum disorders. Sport Educ Soc. 2016 Jul;21(5):698-722.
15. Lindsay S, Morales E, Yantzi N, Vincent C, Howell L, Edwards G. The experiences of participating in winter among youths with a physical disability compared with their typically developing peers. Child Care Health Dev. 2015 Nov;41(6):980-988.
16. Nguyen XT, Mitchell C, de Lange N, Fritsch K. Engaging girls with disabilities in Vietnam: making their voices count. Disabil Soc. 2015 May;30(5):773-787.
17. Obrusnikova I, Cavalier AR. Perceived barriers and facilitators of participation in after-school physical activity by children with autism spectrum disorders. J Dev Phys Disabil. 2011 Jun;23(3):195-211.
18. Ripat JD, Woodgate RL. The importance of assistive technology in the productivity pursuits of young adults with disabilities. Work. 2017 Jan;57(4):455-468.
19. Whitney JC. My Education: Students with Disabilities Describe High School in Pictures and Words. TEC+. 2006 Nov;3(2):n2.
